# Emergence of a Novel Reassortant Clade 2.3.2.1c Avian Influenza A/H5N1 Virus Associated with Human Cases in Cambodia

Jurre Y. Siegers<sup>1\*</sup>, Ruopeng Xie<sup>2,3\*</sup>, Alexander M.P. Byrne<sup>4\*</sup>, Kimberly M. Edwards<sup>2,3</sup>, Shu Hu<sup>2,3</sup>, Sokhoun Yann<sup>1</sup>, Sarath Sin<sup>1</sup>, Songha Tok<sup>1</sup>, Kimlay Chea<sup>1</sup>, Sreyviseth Horm<sup>1</sup>, Chenthearath Rith<sup>1</sup>, Seangmai Keo<sup>1</sup>, Leakhena Pum<sup>1</sup>, Veasna Duong<sup>1</sup>, Heidi Auerswald<sup>1</sup>, Yisuong Phou<sup>1</sup>, Sonita Kol<sup>1</sup>, Andre Spiegel<sup>4</sup>, Ruth Harvey<sup>5</sup>, Sothyra Tum<sup>6</sup>, San Sorn<sup>6</sup>, Bunnary Seng<sup>6</sup>, Yi Sengdoeur<sup>7</sup>, Chau Darapheak<sup>8</sup>, Chin Savuth<sup>8</sup>, Makara Hak<sup>9</sup>, Vanra Ieng<sup>10</sup>, Sarika Patel<sup>10</sup>, Han Di<sup>11</sup>, Charles Todd Davis<sup>11</sup>, Alyssa Finlay<sup>12</sup>, Borann Sar<sup>12</sup>, Peter Thielen<sup>13</sup>, Filip F. Claes<sup>14</sup>, Nicola S. Lewis<sup>5</sup>, Ly Sovann<sup>7</sup>, Vijaykrishna Dhanasekaran<sup>2,3#</sup>, Erik A. Karlsson<sup>1#</sup>

<sup>1</sup> Virology Unit, Institut Pasteur du Cambodge, Phnom Penh, Cambodia

<sup>2</sup> School of Public Health, LKS Faculty of Medicine, The University of Hong Kong, Hong Kong SAR, China.

<sup>3</sup> HKU-Pasteur Research Pole, LKS Faculty of Medicine, The University of Hong Kong, Hong Kong SAR, China.

<sup>4</sup> Direction, Institut Pasteur du Cambodge, Phnom Penh, Cambodia

<sup>5</sup> Worldwide Influenza Centre, The Francis Crick Institute, London, UK.

<sup>6</sup> National Animal Health and Production Research Institute, Phnom Penh, Cambodia.

<sup>7</sup> Communicable Disease Control Department, Ministry of Health, Phnom Penh, Cambodia.

<sup>8</sup> National Institute of Public Health, Ministry of Health, Phnom Penh, Cambodia

<sup>9</sup> Food and Agriculture Organization of the United Nations (FAO) Country Office, Phnom Penh, Cambodia.

<sup>10</sup> World Health Organization Country Office, Phnom Penh

<sup>11</sup> United States Centers for Disease Control and Prevention, Atlanta, GA, USA

<sup>12</sup> United States Centers for Disease Control and Prevention Country Office, Phnom Penh, Cambodia

<sup>12</sup> Johns Hopkins University Applied Physics Laboratory, Laurel, MD, USA

<sup>13</sup> FAO Emergency Centre for Transboundary Animal Diseases, Regional Office for Asia and the Pacific, Bangkok, Thailand

\*These authors contributed equally

#**Address for Correspondence:** For correspondence regarding avian influenza in Cambodia and Southeast Asia, please contact Dr. Erik Karlsson at [ekarlsson@pasteur-kh.org](mailto:ekarlsson@pasteur-kh.org). For inquiries related to influenza ecology and evolution, please contact Dr. Vijaykrishna Dhanasekaran at [veej@hku.hk](mailto:veej@hku.hk).

**Keywords:** avian influenza, H5N1, Cambodia, Southeast Asia, One Health, genomic surveillance

## 44 I. Abstract

45 After nearly a decade without reported human A/H5N1 infections, Cambodia faced a sudden  
46 resurgence with 16 cases between February 2023 and August 2024, all caused by A/H5 clade  
47 2.3.2.1c viruses. Fourteen cases involved a novel reassortant A/H5N1 virus with gene segments from  
48 both clade 2.3.2.1c and clade 2.3.4.4b viruses. The emergence of this novel genotype underscores  
49 the persistent and ongoing threat of avian influenza in Southeast Asia. This study details the timeline  
50 and genomic epidemiology of these infections and related poultry outbreaks in Cambodia.

51

## 52 II. Introduction

53 Avian influenza viruses (AIVs), particularly highly pathogenic avian influenza (HPAI) A/H5N1 strains,  
54 have caused significant economic losses in the poultry industry and pose a serious zoonotic threat  
55 (1). Monitoring AIV circulation and evolution in high-risk regions, such as the Greater Mekong  
56 Subregion (GMS), is crucial due to the region's heavy reliance on agriculture, particularly backyard  
57 poultry farming, which often operates with minimal biosafety or biosecurity measures.

58

59 Cambodia, a lower middle-income country in the GMS has a large socio-economic dependence on  
60 agriculture and faces ongoing circulation of AIVs in poultry. Longitudinal surveillance at key live bird  
61 markets (LBMs) in Cambodia has shown year-round co-circulation of AIVs of agricultural and zoonotic  
62 concern including HPAI A/H5N1, low pathogenic avian influenza (LPAI) A/H9N2, and to a lesser  
63 extent, A/H7 viruses<sup>1-4</sup>. In addition, there has been infrequent detection of wild-bird-associated LPAI  
64 subtypes, including A/H1, A/H2, A/H3, A/H4, A/H6, A/H10, A/H11, and even A/H14, the latter marking  
65 the first detection of this subtype in Asia<sup>5-7</sup>. Along with the high prevalence of AIV in poultry,  
66 Cambodia has faced numerous instances of zoonotic spillover between 2005 and 2014, resulting in  
67 21 human cases of A/H5N1, with 19 deaths (case-fatality rate [CFR]: 90.5%) by the end of 2012. In  
68 January 2013, a clade 1.1.2 reassortant virus emerged in poultry in the GMS, containing the  
69 hemagglutinin (HA) and neuraminidase (NA) genes from a clade 1.1.2 genotype Z virus and internal  
70 genes from a clade 2.3.2.1a virus. Following the emergence of this novel reassortant, 26 new human  
71 cases were reported in 2013 alone, with 15 deaths (CFR: 57.9%)<sup>5,8</sup>. The outbreak continued into the  
72 first quarter of 2014, resulting in 8 confirmed cases and 4 deaths (CFR: 50%)<sup>9</sup>. This clade 1.1.2

73 reassortant virus was replaced by clade 2.3.2.1c viruses in poultry by March 2014, with only one  
74 clade 2.3.2.1c human infection occurring thereafter<sup>3</sup>. The reassortant 1.1.2 virus has not been  
75 detected since. HPAI A/H5 clade 2.3.2.1c viruses have continued to circulate in the GMS since then<sup>10</sup>;  
76 however, clade 2.3.4.4b viruses were first detected in Cambodian LBMs in 2021, co-circulating with  
77 clade 2.3.2.1c viruses<sup>11</sup>.

78

79 After almost a decade without a human case, a cluster of A/H5N1 cases involving two related  
80 individuals was detected in February 2023 caused by the historically circulating clade 2.3.2.1c viruses  
81 (1 death, CFR: 50%). Between October 2023 and end of August 2024, Cambodia reported 14 more  
82 A/H5N1 cases (6 deaths, CFR: 42.8%). Critically, this recent surge in human A/H5N1 cases is linked  
83 to the emergence of a novel reassortant genotype, which combines elements from multiple AIV  
84 lineages. This study aims to elucidate the timeline, transmission dynamics, and evolutionary patterns  
85 of these A/H5N1 viruses across human and avian populations in Cambodia between February 2023  
86 and August 2024. Here, we seek to trace viral origins, identify transmission pathways, and assess  
87 potential for increased risks to human health.

88

### 89 **III. Materials and Methods**

#### 90 **Ethical approval**

91 All H5 sequences and information (e.g. collection date, location) included in this analysis were  
92 obtained as part of human H5 case testing and One Health response as described below. All data  
93 included in this study is available in the public record. All patient samples were de-identified and no  
94 other individual-specific information was used in this study. Analyses in this study have been  
95 approved by the Cambodian National Ethics Committee for Health Research (#365NECHR/2024).

96

#### 97 **Sample collection**

##### 98 ***Human case detection***

99 The Cambodian Influenza-like Illness (ILI) and Severe Acute Respiratory infections (SARI)  
100 surveillance systems are part of the WHO Global Influenza Surveillance and Response System and  
101 are a public health activity managed by the Ministry of Health (MoH) and Cambodia's Communicable

102 Disease Control (CCDC) Department. This surveillance system has existed since 2006, with  
103 increased capacity during the COVID-19 pandemic. Cases were also detected through event-based  
104 surveillance and active case finding.

### 105 ***Case investigation***

106 For each human case, a collaborative One Health investigation was conducted by MoH-CCDC, the  
107 National Animal Health and Production Research Institute (NAHPRI), Ministry of Environment, and  
108 provincial authorities, with assistance from the United States Centers for Disease Control and  
109 Prevention (US CDC), the World Health Organization (WHO), and the Food and Agriculture  
110 Organization of the United Nations (FAO).

### 111 ***Animal sampling***

112 Animal sampling was conducted by NAHPRI under the direction of the General Directorate for Animal  
113 Health and Production (GDAHP), Cambodian Ministry of Agriculture, Forestry and Fisheries (MAFF)  
114 along with provincial officials as part of One Health investigations surrounding each human case. In  
115 addition, Institut Pasteur du Cambodge (IPC) and NAHPRI/GDAHP collaborate on active disease  
116 surveillance activities focusing on LBMs<sup>11</sup>, with assistance from the Food and Agriculture  
117 Organization of the United Nations (FAO).

### 118 **RNA extraction and qRT-PCR**

119 Viral RNA was extracted from samples using the QIAamp Viral RNA Mini Kit (Qiagen, Maryland, USA)  
120 according to the manufacturer's protocol. Quantitative real-time reverse transcription PCR (qRT-PCR)  
121 was performed to screen for the matrix (MP) gene of influenza A virus, as described previously<sup>6,7</sup>.  
122 Samples with a cycle threshold (Ct) value <40 were deemed positive. Both original samples and  
123 isolates were subtyped using influenza RT-PCR assays to test for H1, H3, H5, H7 and H9 HA genes  
124 and N1, N2, N6, N8 and N9 NA genes<sup>6,7</sup>.

125

### 126 **Virus isolation**

127 Virus isolation was attempted for all qRT-PCR positive human and poultry samples from each  
128 outbreak cluster<sup>12</sup>. Ten-day-old embryonated hens' eggs were inoculated via the allantoic route and  
129 allantoic fluid was harvested three days post inoculation. For each sample, three blind passages were

130 performed. Additionally, virus isolation from human samples was performed using Madin-Darby  
131 canine kidney (MDCK) cells stably transfected with human CMP-*N*-acetylneuraminase:β-galactoside  
132 α-2,6-sialyltransferase (SIAT1), which leads to overexpression of the α-2,6-linked sialic acid (α2,6-SA)  
133 receptor<sup>13</sup>. The presence of influenza virus in the allantoic fluid and cell culture supernatant was  
134 tested using qRT-PCR as described above.

135

## 136 **Sequencing**

137 Whole viral genomes were amplified from patient nasal swabs, poultry samples, and/or isolates using  
138 a modified multi-segment RT-PCR method that includes integrated molecular indices (iiMS-PCR)<sup>14</sup>.  
139 The iiMS-PCR products were then pooled, prepared for sequencing with the ligation sequencing kit  
140 SQK-LSK114 (R10 chemistry, Oxford Nanopore Technologies (ONT), Oxford, UK) and sequenced on  
141 the GridION platform (ONT) using R10 flow cells as described previously<sup>15</sup>. Sequencing reads were  
142 de-multiplexed, quality trimmed, and filtered using Porechop software  
143 (<https://github.com/rrwick/Porechop>). Consensus sequences were generated using CDC's Iterative  
144 Refinement Meta Assembler (IRMA) v1.1.4 using the default "IRMA FLU-minion" settings<sup>16</sup>.  
145 Consensus sequences were manually inspected for errors such as insert-deletion mutations (INDELs)  
146 and mixed bases and corrected if required. A minimum coverage depth of 10x was set for all genes.  
147 Genomic sequencing was completed for twelve of the fifteen reported human cases, with one HA  
148 sequence (A/Cambodia/RL240007/2024) being partial. This study generated a total of 83 gene  
149 segments obtained from 12 human A/H5N1 and 329 segments from 51 avian A/H5N1 influenza A  
150 viruses were deposited in GISAID. Accession numbers can be found in supplemental table 2.

151

## 152 **Phylogenetic analysis**

153 All available full-genome H5Nx influenza A virus sequences (N = 11,765), including the internal  
154 protein coding genes were obtained from GISAID EpiFlu<sup>17</sup> (26) databases (accessed on 2024-03-21).  
155 The full genome sequences were concatenated using SeqKit<sup>18</sup> and aligned prior to the inference of  
156 preliminary maximum-likelihood (ML) phylogenetic trees with Augur<sup>19</sup>. This tree was then down-  
157 sampled to maintain phylogenetic representatives using PARNAS<sup>20</sup>. Sequences generated in this  
158 study, along with publicly available sequences from Asia since 2020-01-01, were added to this

159 dataset to enhance regional representation and maximize phylogenetic diversity. Sequences  
160 identified as duplicates (based on strain name), laboratory-derived, mixed subtypes, or with coverage  
161 <90% of full length were excluded from further analysis. Each gene dataset was aligned with MAFFT  
162 v.7.490<sup>21</sup>, and optimized manually. Large-scale ML phylogenetic trees were inferred with FastTree  
163 v2<sup>22</sup> using the GTR nucleotide substitution model. Focused ML trees were generated in IQ-TREE  
164 v.2.2.0<sup>23</sup> using the best-fit nucleotide substitution model (HKY+Γ+G4) chosen according to  
165 Bayesian Information Criterion. Trees were visualized and annotated using FigTree v.1.4.4  
166 (<http://tree.bio.ed.ac.uk/software/figtree/>) and ggTree<sup>24</sup> in R (version 4.2.2).

167

## 168 **Reassortment analysis**

169 To investigate reassortment events among major clades (2.3.2.1c, 2.3.4.4b, 2.3.4.4x, 2.3.2.1a, 2.3.4,  
170 1.1.2) and minor clades since 1996, we first constructed a ML tree for HA gene sequences using IQ-  
171 TREE v.2.1.4. We subsampled 1,000 genomes, ensuring all Cambodian sequences were retained,  
172 using the Phylogenetic Diversity Analyzer tool v.1.0.3 (<http://www.cibiv.at/software/pda>).  
173 Subsequently, we constructed ML trees for the remaining seven segments, including polymerase  
174 basic 2 (PB2), polymerase basic 1 (PB1), polymerase acidic (PA), neuraminidase (NA), nucleoprotein  
175 (NP), matrix (MP), and non-structural (NS) gene segments of the 1,000 subsampled genomes. Baltic  
176 v.0.1.5 (<https://github.com/evogytis/baltic>) was used to visualize the incongruence between the  
177 phylogenetic trees across the eight genes. The HA tree was rooted using clade 0, while the other  
178 trees were rooted at the midpoint.

179

## 180 **Molecular marker analysis**

181 Molecular markers were analyzed using a pipeline described previously<sup>25</sup> and Flutile  
182 (<https://github.com/flu-crew/flutile>).

183

184

185

186

## 187 **IV. Results**

### 188 **Direct poultry-to-human transmission with no evidence of human-to-human spread**

189 Viruses sequenced from human cases in February 2023 in Prey Veng province were closely related  
190 to A/H5N1 viruses from poultry in Cambodian LBMs between 2022 and 2023, particularly from Phnom  
191 Penh and Kandal provinces (Figure 1a-c). Similarly, viruses from human cases in October 2023 (Svay  
192 Rieng and Prey Veng province), November 2023 (Kampot province), January 2024 (Siem Reap  
193 province), February 2024 (Kratie province), and early July 2024 (Svay Rieng province) were  
194 genetically similar to poultry viruses collected at their respective outbreak sites. Although the January  
195 2024 Prey Veng human case lacked direct poultry-associated sequences, it was related to viruses  
196 detected from LBMs in Prey Veng and Kandal in January 2024. In February 2024, no viral sequences  
197 could be obtained from neither the Kampot human case nor poultry associated cases. In July 2024,  
198 no human viruses could be sequenced from the two Takeo province cases, although the two poultry-  
199 associated viruses were closely related to human and poultry viruses from the October 2023 Svay  
200 Rieng and one duck virus from the October 2023 Prey Veng outbreak. Investigations into the August  
201 2024 cases Prey Vengcase showed that this virus was related to human and poultry viruses from  
202 October 2023 (Prey Veng and Svay Rieng) and July 2024 (Kampot). These findings consistently  
203 suggest zoonotic transmission from poultry to humans, with no evidence of human-to-human  
204 transmission (Figure 1c).

205

### 206 **Genotype replacement by a novel reassortant clade 2.3.2.1c virus in late 2023**

207 Phylogenetic analysis of the HA gene segment reveals that all A/H5 viruses sequenced from human  
208 cases belong to clade 2.3.2.1c (Figure 1c). The virus responsible for the initial cases in February 2023  
209 was closely related to clade 2.3.2.1c A/H5N1 viruses circulating in Cambodian poultry and wild birds  
210 since 2013<sup>1</sup>. These early viruses retained complete gene cassettes within clade 2.3.2.1c viruses  
211 (Figure 2). However, starting in late 2023 (October), HA sequences from both humans and poultry in  
212 Cambodia displayed significant divergence from earlier Cambodia strains. These HA genes clustered  
213 with two duck samples from Vietnam during July and August 2023, and were derived from a  
214 sublineage of clade 2.3.2.1.c continuously detected in Laos during October 2020 and May 2023.

215 Together, this indicates an introduction of a sublineage of clade 2.3.2.1c viruses with a common  
216 ancestor detected in poultry in Vietnam and Laos, but the exact introduction pathway cannot be  
217 pinpointed due to gaps in available surveillance data..

218 Phylogenetic analyses of each of the gene segments revealed that A/H5N1 viruses in Cambodia,  
219 detected from October 2023 onwards in both humans and poultry, represent a novel genotype  
220 resulting from reassortment. This reassortment combines segments from clade 2.3.2.1c (HA, NP, and  
221 NA) and clade 2.3.4.4b (PB2, PB1, PA, MP, and NS) viruses (Figure 2). In Cambodia, this novel  
222 2.3.2.1c genotype has completely replaced the endemic 2.3.2.1c genotype that has dominated in  
223 poultry for the last decade.

#### 224 **Molecular markers of risk in novel reassortant genotype Cambodian A/H5N1 viruses have the** 225 **potential for increased mammalian adaptation**

226 Gene segments from the Cambodian human A/H5N1 viruses were analyzed for adaptive mutations  
227 affecting receptor binding affinity, HA fusion and/or stability, polymerase activity, virus replication in  
228 mammalian cells, and pathogenicity (Supplemental Table 1)<sup>26</sup>. All human A/H5N1 viruses isolated  
229 since 2023 are classified asHPAI due to the presence of a multi-basic cleavage site in the HA gene<sup>27</sup>.  
230 Three different cleavage sites were present: PQKERRKR↓GLF in human cases in February 2023,  
231 PQRERRKR↓GLF in cases from October 2024 to January 2024 and from July 2024 onwards, and  
232 KERRRKKR↓GLF, containing two additional basic amino acids from cases in February 2024.

233 Among the minimal set of five substitutions that confer airborne transmissibility in ferrets for the HPAI  
234 A/H5N1 virus strain A/Indonesia/5/2005 (E627K in PB2; H99Y in PB1; H103Y, T156A, and either  
235 Q222L or G224S in HA)<sup>28,29</sup>, only HA 156A was consistently observed in all A/H5N1 viruses from  
236 Cambodian human cases. Notably, a subset of the novel genotype forms a monophyletic lineage in  
237 the HA tree (arrow in Fig 1c, bootstrap value 92), and contains PB2 E627K, a key molecular  
238 determinant for host range, cross-species transmission and airborne transmission (PMID: 8445709  
239 and 22723413)None of the human viruses from Cambodia contained previously defined HA  
240 substitutions (Q222L and G224S (H5 HA numbering) that switch receptor specificity from avian  $\alpha$ 2,3-  
241 SA to human  $\alpha$ 2,6-SA<sup>30</sup>. The presence of PB2 E627K and HA T156A substitutions, along with the  
242 potential for other functionally similar mutations, underscores the need for close monitoring of these  
243 A/H5N1 strains for signs of potential increased mammalian adaptation<sup>31</sup>.



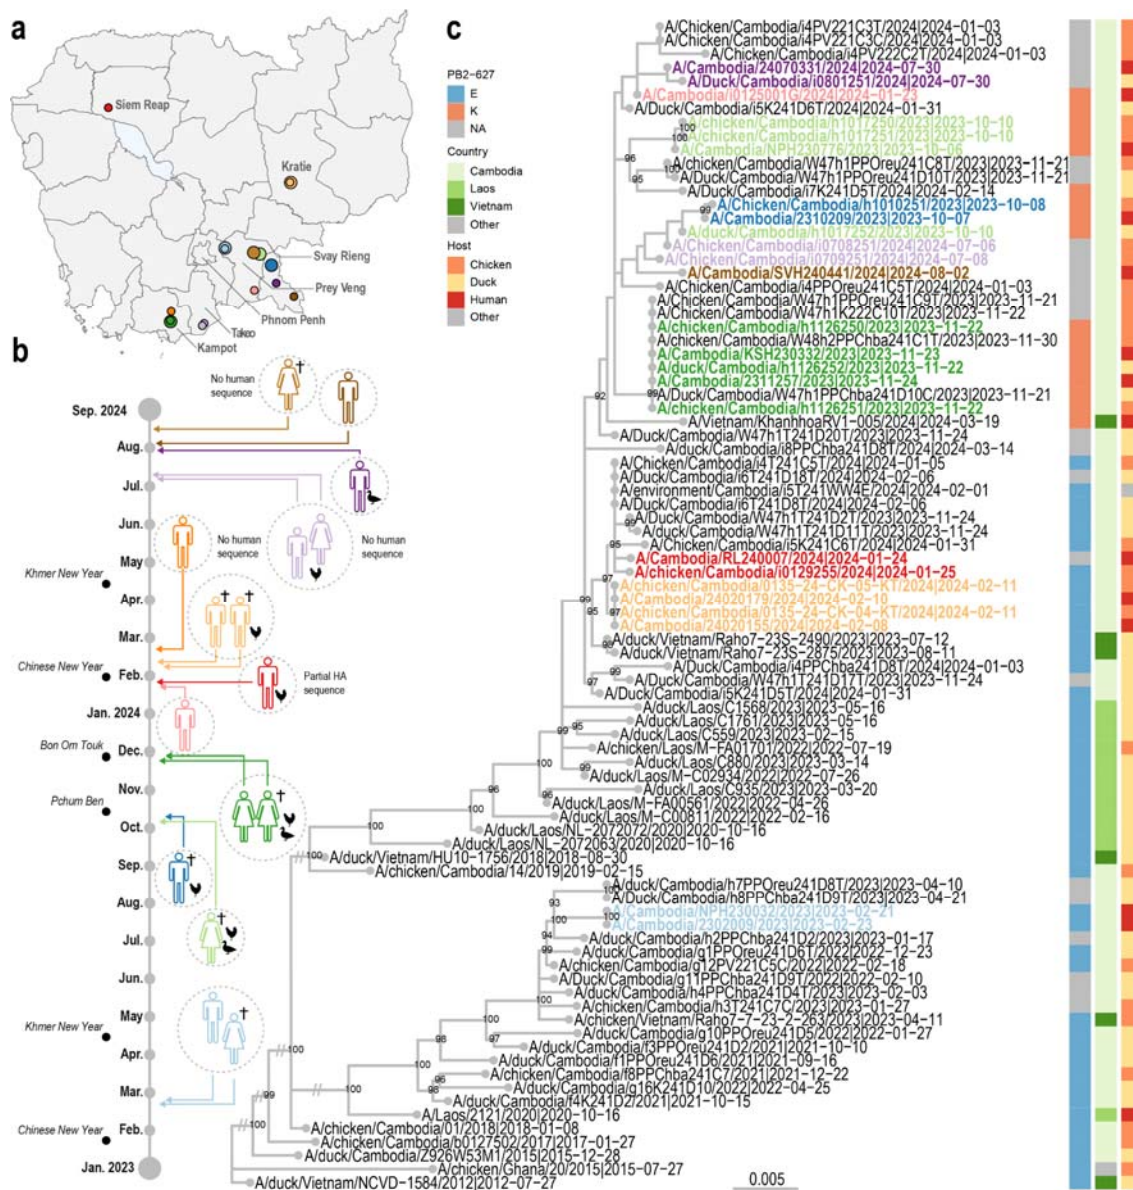

244

245 **Figure 1. Geographic location, timeline of events, and phylogenetic relationships of human A/H5N1 infections and**  
 246 **poultry-associated clade 2.3.2.1c A/H5N1 viruses in Cambodia, February 2023 - July 2024. a)** Map of human A/H5N1  
 247 cases. Circles indicate clinical outcome, with smaller circles for recovered individuals and larger circles for fatal cases, colored  
 248 by outbreak cluster. **b)** Timeline of A/H5N1 human cases. Colors represent outbreak clusters; dotted circles indicate  
 249 epidemiologically linked cases; mortality symbols indicate fatal cases; chicken and duck silhouettes denote associated poultry  
 250 viruses; and major Cambodian festivals are labeled. **c)** Maximum likelihood phylogenetic tree of the A/H5 HA genes, with  
 251 human and poultry-associated A/H5N1 viruses colored by outbreak cluster. The color-coded right y-axis represent the E/K  
 252 amino acid in the PB2 gene at position 627 (blue/orange), country of isolation (shades of green) and host (shades of red),  
 253 respectively. Bootstrap values >80% are indicated. Scale bar denotes nucleotide substitutions per site. Tree is rooted to the  
 254 clade 2.3.2.1c vaccine strain, A/duck/Vietnam/NCVD-1584/2012. Names are provided as strain\_name | collection\_date.

255

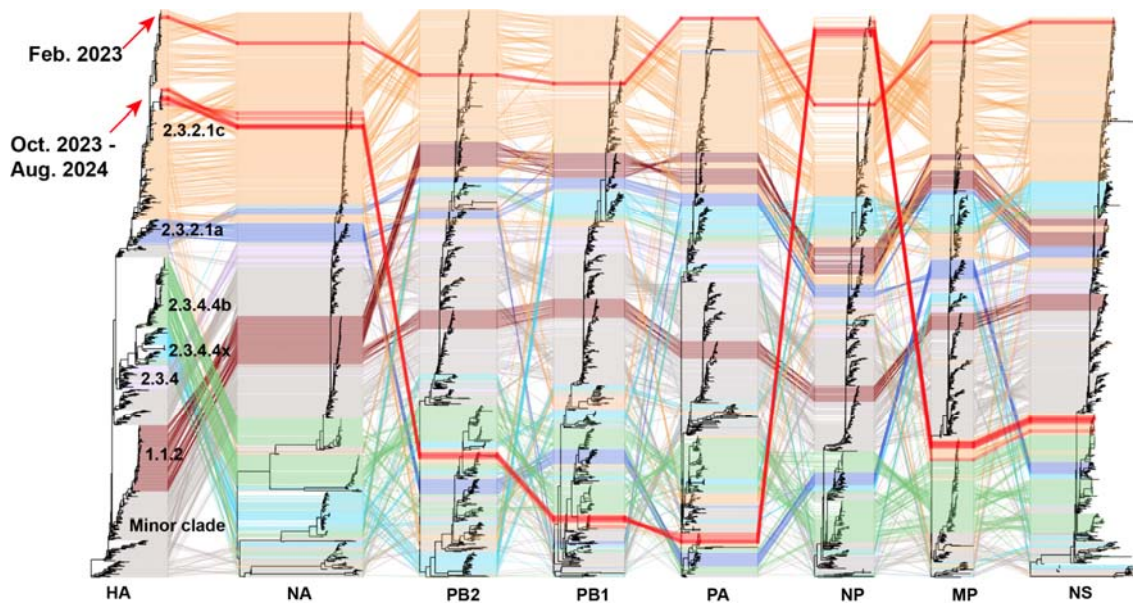

256

257

**Figure 2. Genotypic reassortment patterns of clade 2.3.2.1c A/H5N1 viruses causing human infections in Cambodia since February 2023.** Tanglegram of ML phylogenetic trees for each genomic segment. For each virus, links have been displayed to connect phylogenetic positioning of individual viruses across all eight genomic segments. Phylogenetic links are color coded based on relevant A/H5 clade numbering: clade 2.3.2.1c in orange, 2.3.2.1a in dark blue, 2.3.4.4 in light blue, 2.3.4.4b in green, 2.3.4 in purple, 1.1.2 in brown, minor A/H5N1 clades in grey and recent Cambodian human A/H5N1 sequences in bright red.

263

264

265

266

267

268

269

270

271

272

273

274

275

## 276 V. Discussion

277 Reassortment events leading to the exchange of gene segments between viruses can significantly  
278 alter viral properties and potentially increase the risk for spillover and human infections<sup>32-35</sup>. AIVs with  
279 novel gene combinations have been associated with increases in zoonotic human cases, such as with  
280 A/H5N1 (Cambodia clade 1.1) A/H7N9<sup>34</sup>, A/H3N8<sup>33</sup>, and even human pandemics<sup>32</sup>. Clade 2.3.4.4b  
281 A/H5N1, which has spread globally since its emergence in 2020, has undergone further reassortment  
282 during its dissemination.

283 The resurgence of zoonotic A/H5N1 cases in Cambodia underscores the complex dynamics of AIV  
284 evolution and potential for zoonotic transmission. Phylogenetic analysis identified two distinct spillover  
285 phases. The first phase, in February 2023, involved spillover of a clade 2.3.2.1c virus genotype, which  
286 had been dominant in Cambodian poultry since 2014<sup>3</sup>. The second phase, starting in October 2023, is  
287 marked by a novel reassortant virus combining genes from clades 2.3.2.1c and 2.3.4.4b. The exact  
288 origins of this reassortment are unclear, but likely facilitated by high-density poultry farming, wild bird  
289 migration, and cross-border poultry trade in the region, highlighting the ongoing risk of zoonotic AIV  
290 transmission in Southeast Asia.

291 While the phenotypic contributions of newly introduced clade 2.3.4.4b internal gene segments have  
292 yet to be elucidated, the presence of amino acid mutations in both human and poultry viruses such as  
293 E627K in the 2.3.4.4b-origin PB2 gene segment suggests enhanced capacity for mammalian infection.  
294 To better understand the zoonotic risk that these viruses pose, further risk assessment *in silico*, *ex*  
295 *vivo*, *in vivo*, and *in vitro* is critical. In addition, the detection of the PB2 627K mutation in poultry is  
296 also a concern, as it may become established in widespread circulation.

297 The success of the Cambodian One Health response to these recent reassortant A/H5N1 cases  
298 highlights the importance of coordinated efforts between human and animal health sectors in  
299 managing zoonotic threats. In addition, rapid genomic surveillance has been critical in understanding  
300 the dynamics of virus spillover events and has provided clear evidence linking human cases to  
301 infected poultry from the same household. This integration of genomic data with field investigations  
302 allowed for timely identification of transmission pathways and underscores the importance of

303 ongoing surveillance in high-risk areas. These efforts exemplify the strength of the One Health  
304 approach in Cambodia, where collaboration across disciplines and rapid data sharing have proven  
305 essential for understanding, responding and controlling human AIV outbreaks in the country.

306 Given the success of Cambodian One Health response efforts being able to link cases to direct  
307 contact with infected poultry, public health strategies should prioritize reducing human exposure,  
308 particularly in high-risk rural areas. Reinforcing public education on the risks associated with direct  
309 contact with infected birds has proven effective during other AIV outbreaks, but significant challenges  
310 remain in achieving consistent behavioral changes. Most Cambodians in rural areas are still at high-  
311 risk for potential exposure to AIV<sup>36</sup>. In conjunction with human case investigations, community-based  
312 education campaigns have been implemented in Cambodia, but their reach and effectiveness  
313 vary<sup>37,38</sup>. Only 32% of survey participants reported receiving information about AIV from healthcare  
314 providers, 10.6% from village health support groups, and 2% from village animal health workers  
315 (VAHW)<sup>37</sup>. Furthermore, only 49% of participants reported poultry illness and deaths to local  
316 authorities, and 23% of participants reported that they cook sick or dead poultry for consumption. This  
317 is particularly crucial given that 68.3% of participants raised chickens in their backyards and 10.2%  
318 raised ducks, generating a high level of potential exposure to infected birds<sup>37</sup>. Further research is  
319 necessary to identify, understand and overcome the barriers in risk perception that hinder  
320 individuals from adopting safer behaviors, and to more effectively tailor behavioral messages to  
321 specific target audiences<sup>39</sup>. Educational interventions on the necessity of early access to healthcare,  
322 recognizing AIV infection as a life-threatening disease, and awareness of the risks associated with  
323 handling sick poultry have proven to be a powerful tool in increasing awareness and modifying health  
324 behaviors<sup>40,41</sup>.

325 Training and funding for VAHW and primary healthcare workers (PHW) are critical for early detection  
326 and outbreak response<sup>40-44</sup>. Educational interventions can help VAHW and PHW identify poultry  
327 deaths and exposure history, while also supporting event-based surveillance in both human and  
328 animal sectors. Strengthening VAHW reporting and raising clinical suspicion among healthcare  
329 providers will enhance early detection and case management. Equipping healthcare workers to

330 manage cases effectively and increasing awareness among high-risk individuals about early  
331 healthcare access and poultry-related risks are essential to improving preparedness<sup>40,41</sup>.

332 This study is limited by potential biases in human sample collection due to potential underreporting of  
333 cases from rural areas with limited healthcare access. Additionally, sustainable funding for active AIV  
334 surveillance is lacking across the GMS and broader Asia, resulting in inconsistent data collection and  
335 limited genomic information available for in-depth analysis. Moreover, there is an urgent need to  
336 develop a classification system that better reflects genotypes, as the conventional HA and NA  
337 subtype nomenclature fails to capture the full complexity of reassortant AIV genomes and associated  
338 evolutionary context.

339 In conclusion, these recurrent zoonotic infections caused by a novel reassortant A/H5N1 viruses in  
340 Cambodia serve as a reminder of the ever-present threat of AIV to global health security. Despite the  
341 recent focus on global dissemination and expanded host range of clade 2.3.4.4b<sup>45-47</sup>, clade 2.3.2.1c  
342 viruses remain a significant concern, particularly in Asia, where the two clades co-circulate. A  
343 coordinated, regional approach is essential for effectively monitoring the threat of AIV and ensuring  
344 preparedness and response to emerging viral threats. Indeed, this study underscores the critical need  
345 and effectiveness of a unified, One Health approach to combat the evolving landscape of AIV. The  
346 urgency of this collaborative effort cannot be overstated as these viruses continue to adapt and  
347 reassort, increasing the risk of a strain evolving the capacity for efficient human-to-human  
348 transmission. To stay ahead of this threat, we must prioritize sustainable funding for long-term  
349 surveillance, enhance laboratory capacity for rapid whole genome sequencing, and foster open, trust-  
350 based information sharing across borders. Our collective preparedness today will determine our ability  
351 to protect global health tomorrow.

352

353

354



## 355 VI. Acknowledgments

356 The investigators thank everyone involved in the critical discussions and review of this manuscript.  
357 They also thank everyone involved in influenza surveillance and response in the Kingdom of  
358 Cambodia including teams at the National Institute for Public Health, Cambodian Communicable  
359 Disease Control Department, Ministry of Health, National Animal Health and Production Institute,  
360 General Directorate of Animal Health and Production, Ministry of Agriculture, Forestry, and Fisheries,  
361 World Health Organization, United States Centers for Disease Control and Prevention, provincial  
362 health directors, province rapid response teams, and the Virology Unit at Institut Pasteur du  
363 Cambodge who contributed to this study. We gratefully acknowledge the authors from the originating  
364 laboratories responsible for obtaining the specimens and the submitting laboratories where genetic  
365 sequence data were generated and shared via the GISAID Initiative, on which this research is based  
366 (full list of GISAID acknowledgments are available in supplemental material). We also thank all  
367 National Influenza Centers and laboratories that have supplied influenza viruses to the WHO  
368 Collaborating Centers for Reference and Research on Influenza for analysis. The text as published  
369 does not necessarily represent the official view of US-CDC, WHO, or FAO.

370

## 371 VII. Funding Statement

372 Avian influenza work in the Virology Unit at Institut Pasteur du Cambodge was funded, in part, by  
373 the Food and Agriculture Organization of the United Nations' Global Health Security Program  
374 (funded by USAID), the World Health Organization, and the Bill and Melinda Gates Foundation. H.A.  
375 is supported, in part, by the German Centre for International Migration and Development. P.M.T was  
376 supported by Johns Hopkins APL internal research and development. R.X., K.M.E., S.H. and V.D.  
377 were funded in part by the National Institute of Allergy and Infectious Diseases, National Institutes of  
378 Health, United States Department of Health and Human Services, under Contract No.  
379 75N93021C00016. The funders had no role in study design, data collection and interpretation, or the  
380 decision to submit the work for publication.

381

382 **VIII. Author Contributions**

383 Conceptualization: J.Y.S., R.X., A.M.P.B., K.M.E., N.S.L., V. Dhanasekaran, and E.A.K. Data  
384 curation: J.Y.S., R.X., A.M.P.B., K.M.E., S.H., S.Y., S. Sin, S. Tok, K.C., S.V.H., C.R., S. Keo, L.P.,  
385 H.A., Y.P., S. Kol, R.H., C.D., C.S., V.I., S.P., A.F., B. Sar, V. Dhanasekaran, and E.A.K. Formal  
386 analysis: J.Y.S., R.X., A.M.P.B., K.M.E., S.H., S.Y., S. Sin, S. Tok, K.C., S.V.H., C.R., S. Keo, L.P.,  
387 H.A., Y.P., S. Kol, R.H., N.S.L., V. Dhanasekaran, and E.A.K. Funding acquisition: V. Duong, A.S.,  
388 V.I., S.P., A.F., B. Sar, F.F.C., N.S.L., V. Dhanasekaran, and E.A.K. Investigation: J.Y.S., R.X.,  
389 A.M.P.B., K.M.E., S.H., S.Y., S. Sin, S. Tok, K.C., S.V.H., C.R., S. Keo, L.P., Y.P., S. Kol, R.H., S.  
390 Tum, S. Sorn, B. Seng, Y.S., C.D., C.S., M.H., V.I., S.P., H.D., T.D., A.F., B. Sar, P.T., F.F.C., N.S.L.,  
391 L.S., V. Dhanasekaran, and E.A.K. Methodology: J.Y.S., R.X., A.M.P.B., K.M.E., H.A., P.T., N.S.L., V.  
392 Dhanasekaran, and E.A.K. Project administration: V. Duong, H.A., A.S., S. Tum, S. Sorn, B. Seng,  
393 C.D., C.S., M.H., V.I., S.P., F.F.C., N.S.L., L.S., V. Dhanasekaran, and E.A.K. Resources: V. Duong,  
394 H.A., S. Tum, S. Sorn, B. Seng, C.D., C.S., M.H., V.I., S.P., H.D., T.D., A.F., B. Sar, P.T., F.F.C.,  
395 N.S.L., L.S., V. Dhanasekaran, and E.A.K. Software: P.T. and V. Dhanasekaran Supervision: V.  
396 Duong, H.A., A.S., S. Tum, S. Sorn, B. Seng, Y.S., C.D., C.S., M.H., V.I., S.P., H.D., T.D., A.F., B.  
397 Sar, F.F.C., N.S.L., L.S., V. Dhanasekaran, and E.A.K. Validation: J.Y.S., R.X., A.M.P.B., K.M.E.,  
398 S.Y., S.V.H., V. Dhanasekaran, and E.A.K. Visualization: J.Y.S., R.X., A.M.P.B., K.M.E., V.  
399 Dhanasekaran, and E.A.K. Writing - original draft: J.Y.S., R.X., A.M.P.B., K.M.E., P.T., F.F.C., N.S.L.,  
400 V. Dhanasekaran, and E.A.K. Writing - review & editing: J.Y.S., R.X., A.M.P.B., K.M.E., S.H., S.Y., S.  
401 Sin, S. Tok, K.C., S.V.H., C.R., S. Keo, L.P., V. Duong, H.A., Y.P., S. Kol, A.S., R.H., S. Tum, S. Sorn,  
402 B. Seng, Y.S., C.D., C.S., M.H., V.I., S.P., H.D., T.D., A.F., B. Sar, P.T., F.F.C., N.S.L., L.S., V.  
403 Dhanasekaran, and E.A.K.

404

405 **IX. Conflict Of Interest**

406 The authors declare no conflicts of interest.

407

## 408 X. References

- 409 1 Horwood, P. F. *et al.* Co-circulation of Influenza A H5, H7, and H9 Viruses and Co-infected  
410 Poultry in Live Bird Markets, Cambodia. *Emerg Infect Dis* **24**, 352-355,  
411 doi:10.3201/eid2402.171360 (2018).
- 412 2 Suttie, A. *et al.* The evolution and genetic diversity of avian influenza A(H9N2) viruses in  
413 Cambodia, 2015 - 2016. *PLoS One* **14**, e0225428, doi:10.1371/journal.pone.0225428 (2019).
- 414 3 Suttie, A. *et al.* Diversity of A(H5N1) clade 2.3.2.1c avian influenza viruses with evidence of  
415 reassortment in Cambodia, 2014-2016. *PLoS One* **14**, e0226108,  
416 doi:10.1371/journal.pone.0226108 (2019).
- 417 4 Suttie, A. *et al.* Detection of Low Pathogenicity Influenza A(H7N3) Virus during Duck  
418 Mortality Event, Cambodia, 2017. *Emerg Infect Dis* **24**, 1103-1107,  
419 doi:10.3201/eid2406.172099 (2018).
- 420 5 Horm, S. V. *et al.* Intense circulation of A/H5N1 and other avian influenza viruses in  
421 Cambodian live-bird markets with serological evidence of sub-clinical human infections.  
422 *Emerg Microbes Infect* **5**, e70, doi:10.1038/emi.2016.69 (2016).
- 423 6 Siegers, J. Y. *et al.* Genetic and Antigenic Characterization of an Influenza A(H3N2) Outbreak  
424 in Cambodia and the Greater Mekong Subregion during the COVID-19 Pandemic, 2020. *J*  
425 *Virology* **95**, e0126721, doi:10.1128/JVI.01267-21 (2021).
- 426 7 Siegers, J. Y. *et al.* Detection and phylogenetic analysis of contemporary H14N2 Avian  
427 influenza A virus in domestic ducks in Southeast Asia (Cambodia). *Emerg Microbes Infect* **13**,  
428 2297552, doi:10.1080/22221751.2023.2297552 (2024).
- 429 8 Rith, S. *et al.* Identification of molecular markers associated with alteration of receptor-  
430 binding specificity in a novel genotype of highly pathogenic avian influenza A(H5N1) viruses  
431 detected in Cambodia in 2013. *J Virology* **88**, 13897-13909, doi:10.1128/jvi.01887-14 (2014).



- 432 9 Ly, S. *et al.* Seroprevalence and Transmission of Human Influenza A(H5N1) Virus before and  
433 after Virus Reassortment, Cambodia, 2006-2014. *Emerg Infect Dis* **23**, 300-303,  
434 doi:10.3201/eid2302.161232 (2017).
- 435 10 Suttie, A. *et al.* Avian influenza in the Greater Mekong Subregion, 2003-2018. *Infect Genet*  
436 *Evol* **74**, 103920, doi:10.1016/j.meegid.2019.103920 (2019).
- 437 11 Edwards, K. M. *et al.* Detection of Clade 2.3.4.4b Avian Influenza A(H5N8) Virus in Cambodia,  
438 2021. *Emerg Infect Dis* **29**, 170-174, doi:10.3201/eid2901.220934 (2023).
- 439 12 Brauer, R. & Chen, P. Influenza virus propagation in embryonated chicken eggs. *J Vis Exp*,  
440 doi:10.3791/52421 (2015).
- 441 13 Matrosovich, M., Matrosovich, T., Carr, J., Roberts, N. A. & Klenk, H. D. Overexpression of  
442 the alpha-2,6-sialyltransferase in MDCK cells increases influenza virus sensitivity to  
443 neuraminidase inhibitors. *J Virol* **77**, 8418-8425, doi:10.1128/jvi.77.15.8418-8425.2003  
444 (2003).
- 445 14 Thielen, P. *Influenza Whole Genome Sequencing with Integrated Indexing on Oxford*  
446 *Nanopore Platforms*, <<https://dx.doi.org/10.17504/protocols.io.kxygxm7yzl8j/v1>> (2022).
- 447 15 Ratcliff, J. D. *et al.* Improved Resolution of Highly Pathogenic Avian Influenza Virus  
448 Haemagglutinin Cleavage Site Using Oxford Nanopore R10 Sequencing Chemistry. *bioRxiv*,  
449 2023.2009.2030.560331, doi:10.1101/2023.09.30.560331 (2023).
- 450 16 Shepard, S. S. *et al.* Erratum to: Viral deep sequencing needs an adaptive approach: IRMA,  
451 the iterative refinement meta-assembler. *BMC Genomics* **17**, 801, doi:10.1186/s12864-016-  
452 3138-8 (2016).
- 453 17 Khare, S. *et al.* GISAID's Role in Pandemic Response. *China CDC Wkly* **3**, 1049-1051,  
454 doi:10.46234/ccdcw2021.255 (2021).
- 455 18 Shen, W., Le, S., Li, Y. & Hu, F. SeqKit: A Cross-Platform and Ultrafast Toolkit for FASTA/Q File  
456 Manipulation. *PLOS ONE* **11**, e0163962, doi:10.1371/journal.pone.0163962 (2016).

- 457 19 Huddleston, J. *et al.* Augur: a bioinformatics toolkit for phylogenetic analyses of human  
458 pathogens. *J Open Source Softw* **6**, doi:10.21105/joss.02906 (2021).
- 459 20 Markin, A. *et al.* PARNAS: Objectively Selecting the Most Representative Taxa on a  
460 Phylogeny. *Syst Biol* **72**, 1052-1063, doi:10.1093/sysbio/syad028 (2023).
- 461 21 Katoh, K. & Standley, D. M. MAFFT Multiple Sequence Alignment Software Version 7:  
462 Improvements in Performance and Usability. *Molecular Biology and Evolution* **30**, 772-780,  
463 doi:10.1093/molbev/mst010 (2013).
- 464 22 Price, M. N., Dehal, P. S. & Arkin, A. P. FastTree 2 – Approximately Maximum-Likelihood  
465 Trees for Large Alignments. *PLOS ONE* **5**, e9490, doi:10.1371/journal.pone.0009490 (2010).
- 466 23 Nguyen, L.-T., Schmidt, H. A., von Haeseler, A. & Minh, B. Q. IQ-TREE: A Fast and Effective  
467 Stochastic Algorithm for Estimating Maximum-Likelihood Phylogenies. *Molecular Biology  
468 and Evolution* **32**, 268-274, doi:10.1093/molbev/msu300 (2014).
- 469 24 Yu, G., Smith, D. K., Zhu, H., Guan, Y. & Lam, T. T.-Y. ggtree: an r package for visualization and  
470 annotation of phylogenetic trees with their covariates and other associated data. *Methods in  
471 Ecology and Evolution* **8**, 28-36, doi:https://doi.org/10.1111/2041-210X.12628 (2017).
- 472 25 Byrne, A. M. P. *et al.* Investigating the Genetic Diversity of H5 Avian Influenza Viruses in the  
473 United Kingdom from 2020-2022. *Microbiol Spectr* **11**, e0477622,  
474 doi:10.1128/spectrum.04776-22 (2023).
- 475 26 Suttie, A. *et al.* Inventory of molecular markers affecting biological characteristics of avian  
476 influenza A viruses. *Virus Genes* **55**, 739-768, doi:10.1007/s11262-019-01700-z (2019).
- 477 27 de Bruin, A. C. M. *et al.* Hemagglutinin Subtype Specificity and Mechanisms of Highly  
478 Pathogenic Avian Influenza Virus Genesis. *Viruses* **14**, doi:10.3390/v14071566 (2022).
- 479 28 Herfst, S. *et al.* Airborne transmission of influenza A/H5N1 virus between ferrets. *Science*  
480 **336**, 1534-1541, doi:10.1126/science.1213362 (2012).

- 481 29 Linster, M. *et al.* Identification, characterization, and natural selection of mutations driving  
482 airborne transmission of A/H5N1 virus. *Cell* **157**, 329-339, doi:10.1016/j.cell.2014.02.040  
483 (2014).
- 484 30 Matrosovich, M. N. *et al.* Avian Influenza A Viruses Differ from Human Viruses by  
485 Recognition of Sialyloligosaccharides and Gangliosides and by a Higher Conservation of the  
486 HA Receptor-Binding Site. *Virology* **233**, 224-234,  
487 doi:<https://doi.org/10.1006/viro.1997.8580> (1997).
- 488 31 Russell, C. A. *et al.* The potential for respiratory droplet-transmissible A/H5N1 influenza virus  
489 to evolve in a mammalian host. *Science* **336**, 1541-1547, doi:10.1126/science.1222526  
490 (2012).
- 491 32 Shu, L. P. *et al.* Genetic reassortment in pandemic and interpandemic influenza viruses.  
492 *European Journal of Epidemiology* **12**, 63-70, doi:10.1007/BF00144430 (1996).
- 493 33 Bao, P. *et al.* Human infection with a reassortment avian influenza A H3N8 virus: an  
494 epidemiological investigation study. *Nature Communications* **13**, 6817, doi:10.1038/s41467-  
495 022-34601-1 (2022).
- 496 34 Gao, R. *et al.* Human infection with a novel avian-origin influenza A (H7N9) virus. *N Engl J*  
497 *Med* **368**, 1888-1897, doi:10.1056/NEJMoa1304459 (2013).
- 498 35 Horwood, P. F. *et al.* Transmission experiments support clade-level differences in the  
499 transmission and pathogenicity of Cambodian influenza A/H5N1 viruses. *Emerg Microbes*  
500 *Infect* **9**, 1702-1711, doi:10.1080/22221751.2020.1792353 (2020).
- 501 36 Ly, S., Van Kerkhove, M. D., Holl, D., Froehlich, Y. & Vong, S. Interaction between humans  
502 and poultry, rural Cambodia. *Emerg Infect Dis* **13**, 130-132, doi:10.3201/eid1301.061014  
503 (2007).
- 504 37 Vang, D., Chau, D., Vutha, K. & Um, S. Knowledge, Attitudes, and Practices Related to Avian  
505 Influenza (H5N1) After the Outbreak in Rural, Cambodia. *medRxiv*,  
506 2023.2009.2025.23296059, doi:10.1101/2023.09.25.23296059 (2023).

- 507 38 Waisbord, S. R., Michaelides, T. & Rasmuson, M. Communication and social capital in the  
508 control of avian influenza: lessons from behaviour change experiences in the Mekong  
509 Region. *Glob Public Health* **3**, 197-213, doi:10.1080/17441690801887620 (2008).
- 510 39 World Health Organization. *Addressing the low risk perception of avian flu in Cambodia*,  
511 <[https://www.who.int/westernpacific/news-room/feature-stories/item/addressing-the-low-](https://www.who.int/westernpacific/news-room/feature-stories/item/addressing-the-low-risk-perception-of-avian-flu-in-cambodia)  
512 [risk-perception-of-avian-flu-in-cambodia](https://www.who.int/westernpacific/news-room/feature-stories/item/addressing-the-low-risk-perception-of-avian-flu-in-cambodia)> (2024).
- 513 40 Manabe, T. *et al.* Impact of Educational Intervention Concerning Awareness and Behaviors  
514 Relating to Avian Influenza (H5N1) in a High-Risk Population in Vietnam. *PLOS ONE* **6**,  
515 e23711, doi:10.1371/journal.pone.0023711 (2011).
- 516 41 Manabe, T. *et al.* Knowledge, attitudes, practices and emotional reactions among residents  
517 of avian influenza (H5N1) hit communities in Vietnam. *PLoS One* **7**, e47560,  
518 doi:10.1371/journal.pone.0047560 (2012).
- 519 42 Koh, G. C. *et al.* Avian influenza and South Jakarta primary healthcare workers: a controlled  
520 mixed-method study. *Tropical medicine & international health : TM & IH* **14**, 817-829,  
521 doi:10.1111/j.1365-3156.2009.02297.x (2009).
- 522 43 Tzeng, H.-M. & Yin, C.-Y. Nurses' Fears and Professional Obligations Concerning Possible  
523 Human-to-Human Avian Flu. *Nursing Ethics* **13**, 455-470, doi:10.1191/0969733006nej893oa  
524 (2006).
- 525 44 Kreslake, J. M. *et al.* The Intersection of Care Seeking and Clinical Capacity for Patients With  
526 Highly Pathogenic Avian Influenza A (H5N1) Virus in Indonesia: Knowledge and Treatment  
527 Practices of the Public and Physicians. *Disaster medicine and public health preparedness* **10**,  
528 838-847, doi:10.1017/dmp.2016.81 (2016).
- 529 45 World Health Organization. *Genetic and antigenic characteristics of clade 2.3.4.4b A(H5N1)*  
530 *viruses identified in dairy cattle in the United States of America*,  
531 <[https://www.who.int/publications/m/item/genetic-and-antigenic-characteristics-of-clade-](https://www.who.int/publications/m/item/genetic-and-antigenic-characteristics-of-clade-2.3.4.4b-a(h5n1)-viruses-identified-in-dairy-cattle-in-the-united-states-of-america)  
532 [2.3.4.4b-a\(h5n1\)-viruses-identified-in-dairy-cattle-in-the-united-states-of-america](https://www.who.int/publications/m/item/genetic-and-antigenic-characteristics-of-clade-2.3.4.4b-a(h5n1)-viruses-identified-in-dairy-cattle-in-the-united-states-of-america)> (2024).

533 46 Burrough, E. *et al.* Highly Pathogenic Avian Influenza A(H5N1) Clade 2.3.4.4b Virus Infection  
534 in Domestic Dairy Cattle and Cats, United States, 2024. *Emerging Infectious Disease journal*  
535 **30**, 1335, doi:10.3201/eid3007.240508 (2024).

536 47 Uyeki, T. M. *et al.* Highly Pathogenic Avian Influenza A(H5N1) Virus Infection in a Dairy Farm  
537 Worker. *New England Journal of Medicine* **390**, 2028-2029, doi:doi:10.1056/NEJMc2405371  
538 (2024).

539

## 540 **IX. Supplemental Figures and Tables**

541

542 **Supplemental Table 1.** Molecular marker analysis and amino acid variation between human A/H5N1  
543 virus in Cambodia, 2023-2024.

544 **Supplemental Table 2.** GISAID accession numbers.

545
